# Supplementary material
Source: PubMed Central journal article supplement (PMC3529784)
Supplement: NIHMS418009-supplement-1.pdf [file NIHMS418009-supplement-1.pdf]

**Supplement 1: Analysis of purified F425A1g8 IgG1 and IgA1 variants by SDS-PAGE.**

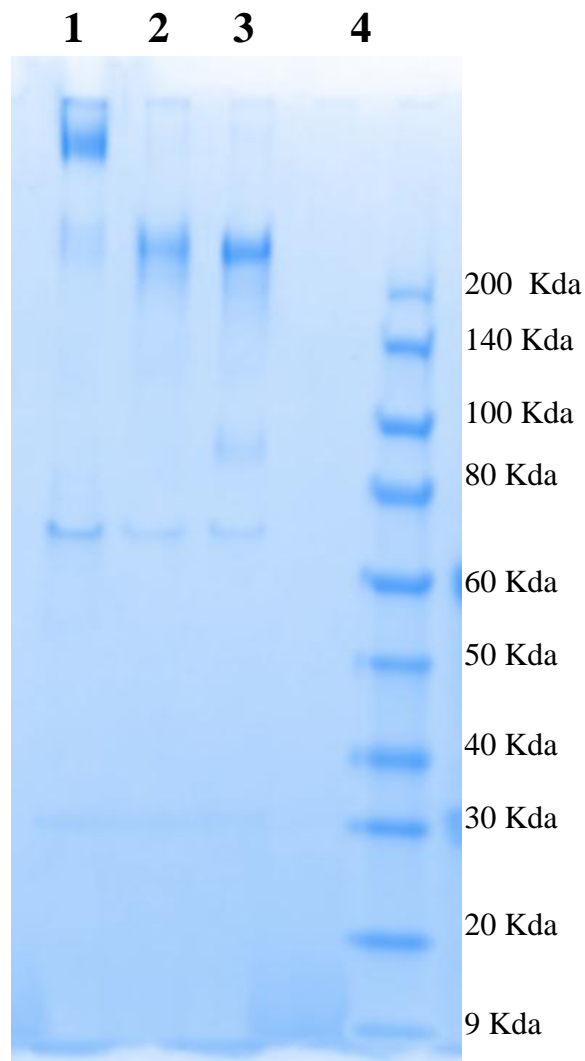

**SDS-PAGE:** 4-20% Pierce Precise Gel, Non-reducing samples 100  $\mu\text{g/ml}$  was loaded as 20  $\mu\text{l/lane}$ . Lane 1: b12 dIgA1, lane 2: b12 IgA1, lane 3: F425A1g8 IgA1, lane 4: pre-stained molecular marker.
